# Supplementary material for: Stratospheric aerosol radiative forcing simulated by the chemistry climate modelEMAC using aerosol CCI satellite data
Source: Copernicus journal article supplement (doi:10.5194/acp-2018-330), 2018-04-23
Supplement: Supplementary file 1 [file acp-2018-330-supplement.pdf]

**Supplement to Brühl et al., Stratospheric aerosol radiative forcing simulated by the chemistry climate model EMAC using aerosol CCI satellite data**

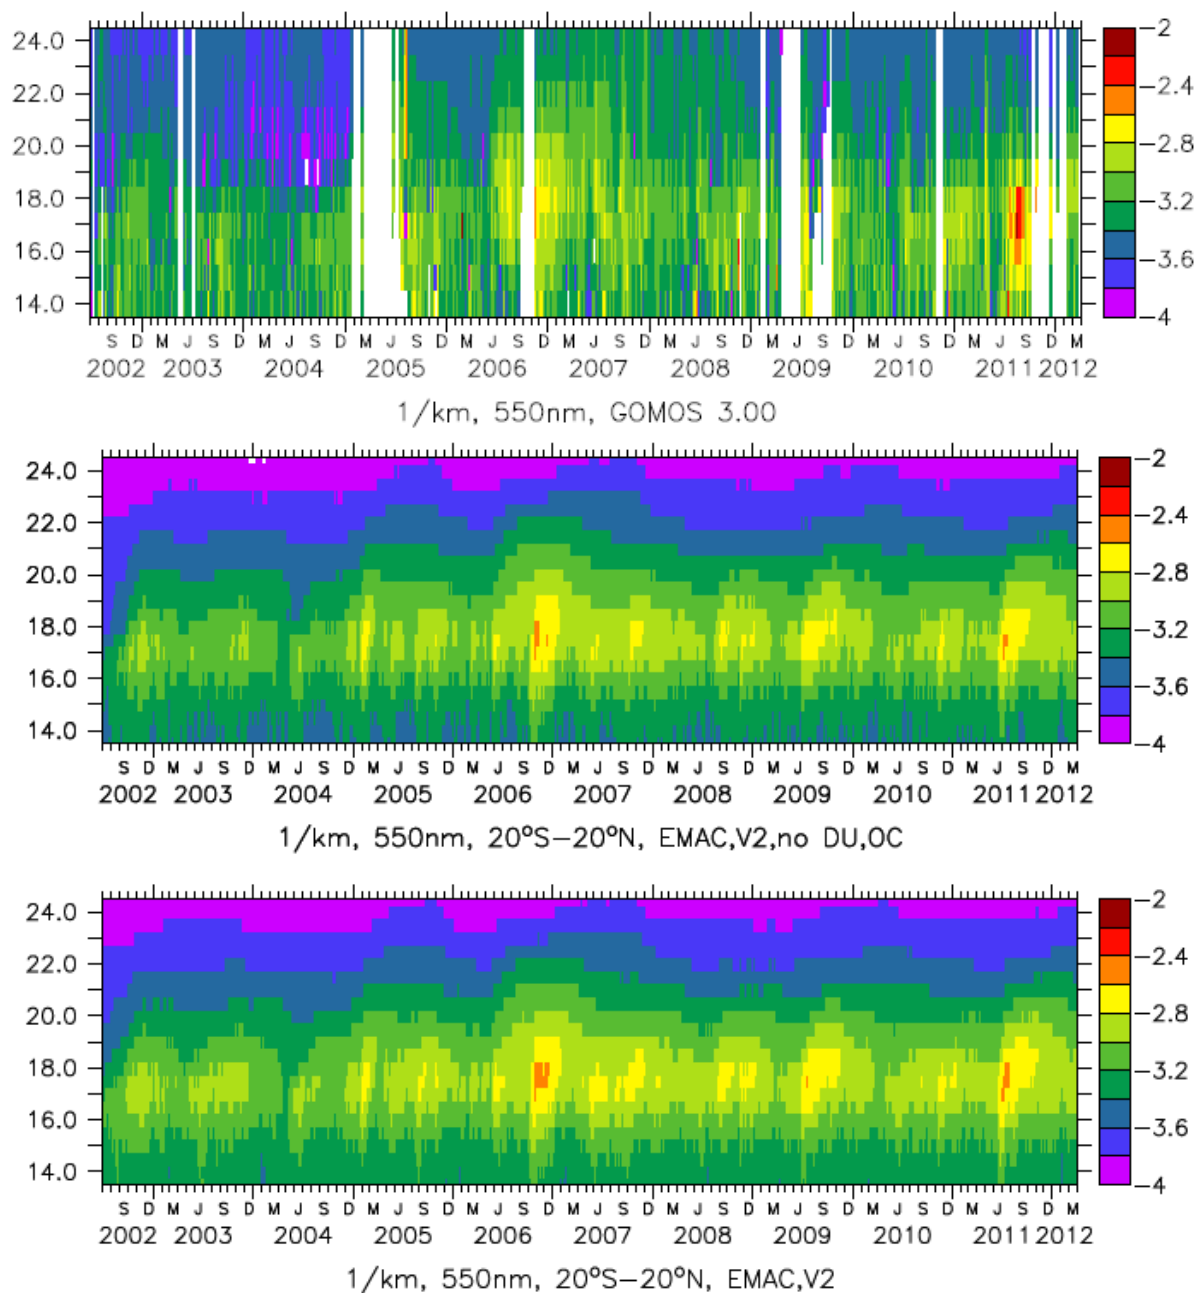

Figure S1: Effect of dust and organic carbon on aerosol extinction at 550nm (decadal logarithm), (top) GOMOS observations, (middle) EMAC without dust and OC, (bottom) original EMAC results in T42 resolution ( $2.8^{\circ} \times 2.8^{\circ}$ ).

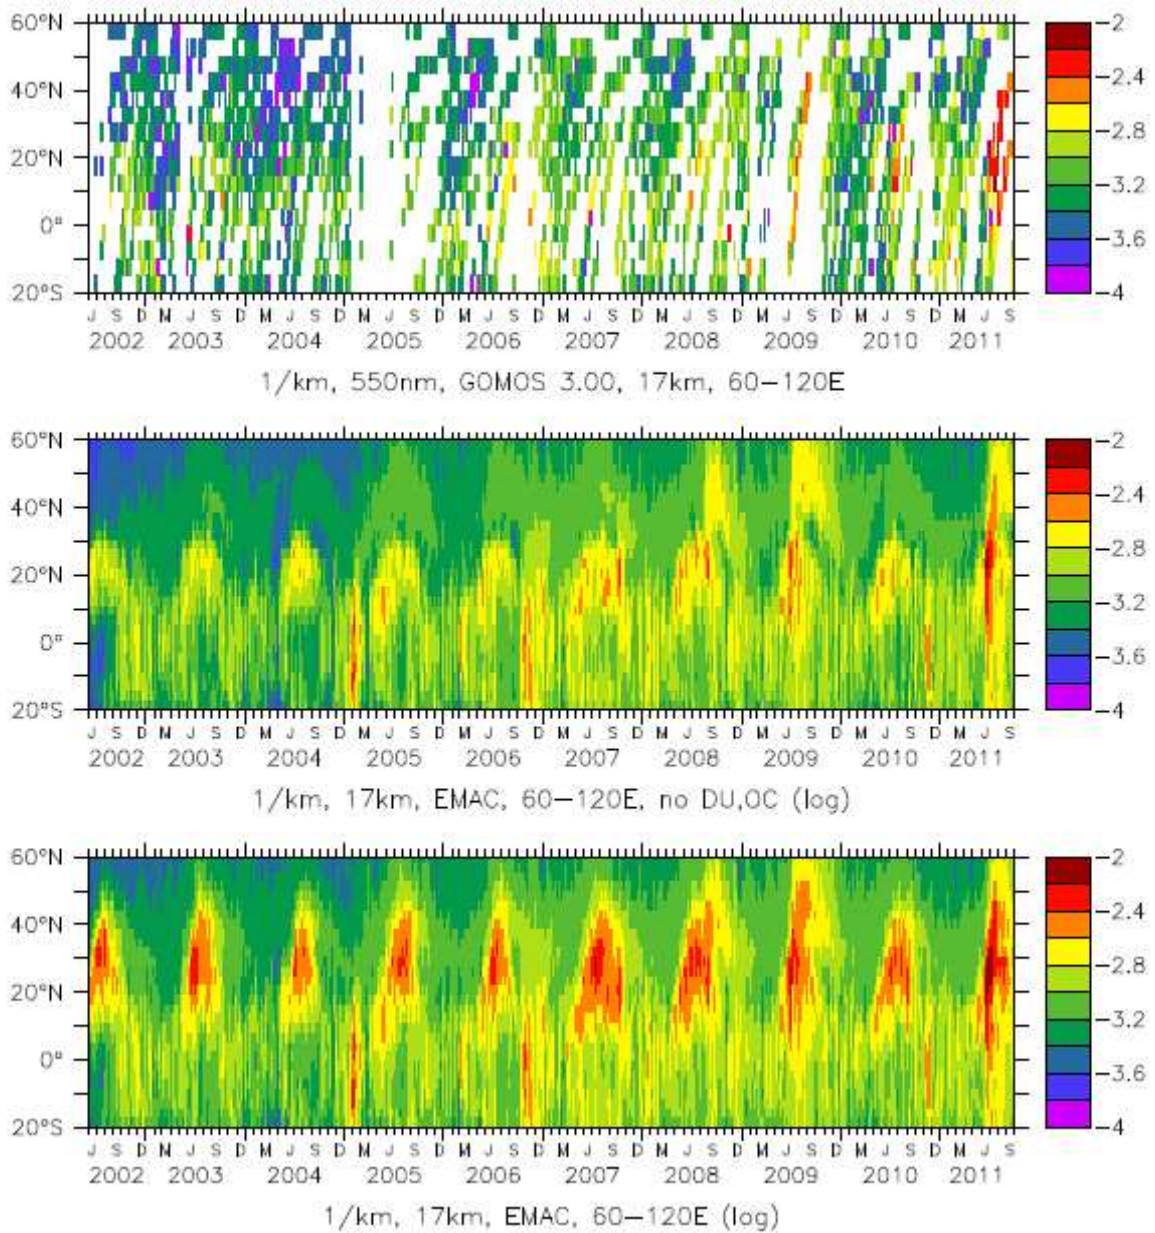

Figure S2: As Figure S1 but for the Asian sector (60°E-120°E, 20°S-60°N) at 17km altitude
